# Supplementary material for: Phloretin Inhibits Quorum Sensing and Biofilm Formation in Serratia marcescens
Source: MDPI journal article supplement (doi:10.3390/molecules28248067), 2023-12-13
Supplement: s1 [file s1]

Article

# Phloretin Inhibits Quorum Sensing and Biofilm Formation in *Serratia marcescens*

Yueheng Qi <sup>1,2,†</sup>, Pengcheng Ji <sup>3,†</sup>, Kunyuan Yin <sup>3</sup>, Yi Zheng <sup>3</sup>, Jiangxiu Niu <sup>2</sup>, Aiqun Jia <sup>1</sup>, Jinwei Zhou <sup>3,\*</sup> and Jingguo Li <sup>1,\*</sup>

<sup>1</sup> Henan Provincial People's Hospital, People's Hospital of Zhengzhou University, Zhengzhou 477150, China;

<sup>2</sup> Luoyang Key Laboratory of Organic Functional Molecules, College of Food and Drug, Luoyang Normal University, Luoyang 471934, China;

<sup>3</sup> School of Food and Biological Engineering, Xuzhou University of Technology, Xuzhou 221018, China;

\* Correspondence: zhoujinwei@xzit.edu.cn (J.Z.); lijingguo@zzu.edu.cn (J.L.); Tel.: +86-516-83105383 (J.Z.); +86-371-65896979 (J.L.); Fax: +86-516-83105383 (J.L.)

<sup>†</sup> These authors contributed equally to this work.

Table S1 PCR primers for qRT-PCR.

| Genes       | Primer direction | Sequence (5'–3')          |
|-------------|------------------|---------------------------|
| <i>katG</i> | F                | GACTTCTTCCGCCACCTGTTCG    |
|             | R                | CGATGTCTTTCGCCACCCACTG    |
| <i>bsmA</i> | F                | TAGTCCGCACACTCATCGC       |
|             | R                | GATCTCCTGCGCCTGTGC        |
| <i>bsmB</i> | F                | GCGGATGTGTATGCCTTCG       |
|             | R                | GCCACGCATTTCTTCACTCA      |
| <i>fimC</i> | F                | CCAAATCCACGCCGGAAC        |
|             | R                | TTGTTCTTGTCGCTGTCCGT      |
| <i>ebp</i>  | F                | CTCAGAGGCACACTGGGCATTG    |
|             | R                | ATTGTCAGCACCGATGGCGATC    |
| <i>pigM</i> | F                | GTTTCGCTCAGTATCGCAGGTGAC  |
|             | R                | GGTAGGCTGCCGTTTCGTTGAAG   |
| <i>pigC</i> | F                | TTCGTCACAAACCGCACTATT     |
|             | R                | CGTCTTTCACCGCCCAT         |
| <i>htpX</i> | F                | GCATCCTGGCGAGCATCATCAC    |
|             | R                | GCAAGGCGGCGATCATCTTCTC    |
| <i>rplT</i> | F                | ATGAAGCAGGCGAAAGGTTACTACG |
|             | R                | CGACGGTCACGGTAAGCATACTG   |
